# Supplementary material for: Downstream Signaling of Inflammasome Pathway Affects Patients’ Outcome in the Context of Distinct Molecular Breast Cancer Subtypes
Source: MDPI journal article supplement (doi:10.3390/ph15060651), 2022-05-24
Supplement: s1 [file s1]

**Table S1.** Characteristics, dilutions and localization of used antibodies

| Antibody target | Antibody type     | Antigen retrieval buffer | Dilution | Supplier     | Code      | Localization |
|-----------------|-------------------|--------------------------|----------|--------------|-----------|--------------|
| NLRP3           | Rabbit polyclonal | EDTA                     | 1:50     | abcam        | Ab214185  | cytoplasm    |
| Pycard          | Mouse monoclonal  | Citrate                  | 1:600    | ThermoFisher | MA5-26363 | cytoplasm    |
| Cyclin D1       |                   |                          |          |              |           |              |
| MYC             |                   |                          |          |              |           |              |

Citrate buffer at pH 6; ethylenediaminetetraacetic acid (EDTA) at pH 7.8. NLRP3: NOD-like receptor protein 3; PYCARD: Apoptosis-Associated Speck-Like Protein Containing a Pyrin and CARD domain;

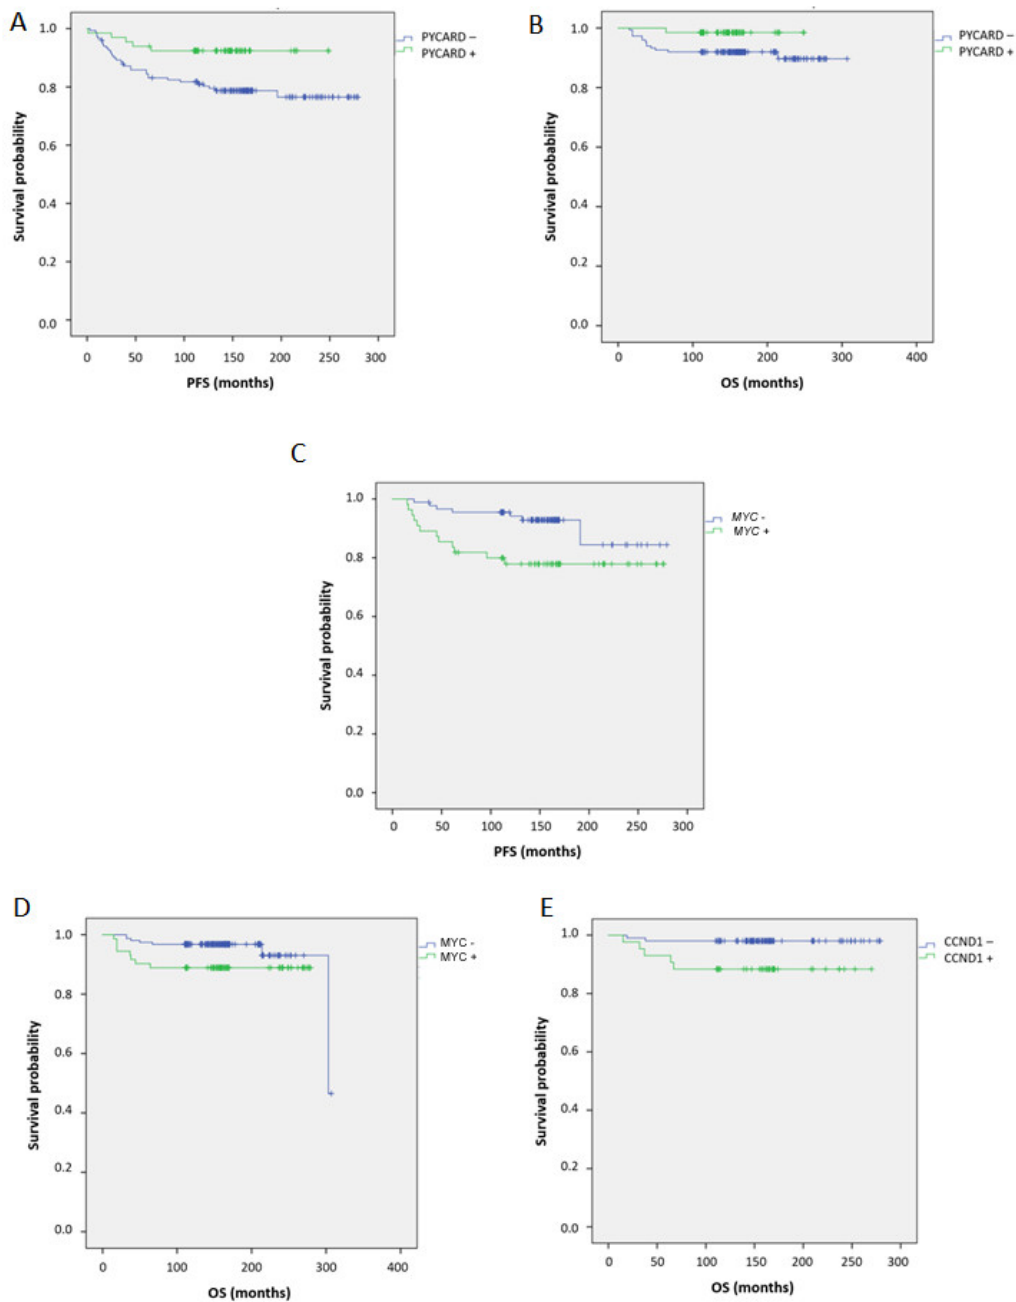

**Figure S1.** Kaplan–Maier curve analysis. (A) Kaplan–Maier curve for PFS according to PYCARD positive versus negative patients( $p=0.017$ ). (B) Kaplan–Maier curve for OS according to PYCARD positive versus negative patients ( $p=0.059$ ). (C) Kaplan–Maier curve for PFS according to MYC gene positive versus negative patients ( $p=0.017$ ). (D) Kaplan–Maier curve for OS according to MYC positive versus negative patients( $p=0.0041$ ) (E) Kaplan–Maier curve for OS according to *CCND1* positive versus negative patients( $p=0.013$ ).

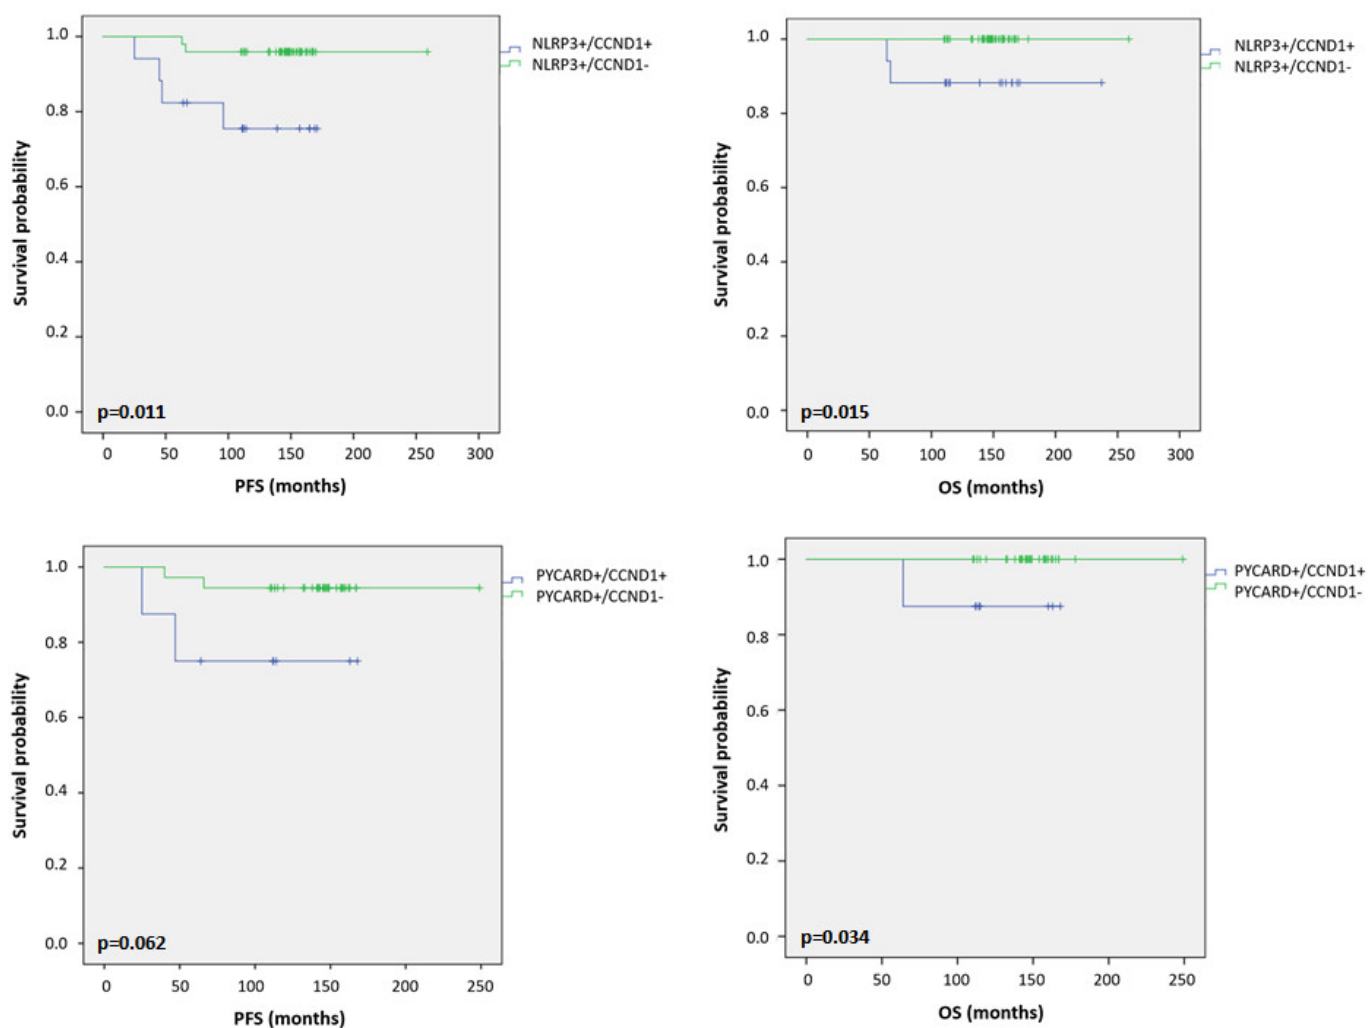

**Figure S2.** Kaplan-Maier curve analysis in Luminal phenotypes. (A) Kaplan-Maier curve for progression-free survival (PFS) according to NLRP3+/CCND1+ versus NLRP3+/CCND1- patients (p=0.011). (B) Kaplan-Maier curve for overall survival (OS) according to NLRP3+/CCND1+ versus NLRP3+/CCND1- patients (p=0.015). (C) Kaplan-Maier curve for PFS according to PYCARD+/CCND1+ versus PYCARD+/CCND1- patients (p=0.062). (D) Kaplan-Maier curve for OS according to PYCARD+/CCND1+ versus PYCARD+/CCND1- patients (p=0.034).
